1 **Title:** Comparing three types of dietary samples for prey DNA decay in an insect  
2 generalist predator

3

4 STEFANIYA KAMENOVA<sup>1,2,3</sup>, REBECCA MAYER<sup>4</sup>, ERIC COISSAC<sup>5,6</sup>, MANUEL  
5 PLANTEGENEST<sup>2</sup> and MICHAEL TRAUOGOTT<sup>4</sup>

6

7 <sup>1</sup>Centre d'Etudes Biologiques de Chizé, Villiers-en-Bois, France, <sup>2</sup>Agrocampus Ouest  
8 UMR1349 IGEPP, 65 rue de Saint-Brieuc, CS 84215, F-35042 Rennes, France,  
9 <sup>3</sup>Integrative Biology, University of Guelph, Guelph, ON, Canada, <sup>4</sup>Mountain Agriculture  
10 Research Unit, Institute of Ecology, University of Innsbruck, Technikerstraße 25, 6020  
11 Innsbruck, Austria, <sup>5</sup>Université Grenoble-Alpes, Laboratoire d'Ecologie Alpine (LECA),  
12 F-38000 Grenoble, France, <sup>6</sup>Centre National de la Recherche Scientifique, Laboratoire  
13 d'Ecologie Alpine (LECA), F-38000 Grenoble, France

14

15 Corresponding author: Stefaniya Kamenova

16 Integrative Biology, University of Guelph, 50 Stone Road East, N1G 2W1, Guelph, ON,  
17 Canada

18 stefaniya.kamenova@gmail.com

19

20 **Keywords:** diagnostic PCR, molecular diet analysis, prey detection, Carabidae, trophic  
21 interactions

22

23 **Running title:** DNA decay in three types of dietary samples

24

25 **Abstract**

26 Molecular diet analysis is rapidly popularizing among ecologists, especially with regard  
27 to methodologically challenging groups such as invertebrate generalist predators. Prey  
28 DNA detection success is known to be dependent on multiple factors among which the  
29 type of dietary sample has rarely been addressed. Here, we address this knowledge  
30 gap by comparing prey DNA detection success from three types of dietary samples. In a  
31 controlled feeding experiment, and using the carabid beetle *Pterostichus melanarius* as  
32 a model predator, we collected regurgitates, feces and whole gut contents at different  
33 time points post-feeding. All dietary samples were analyzed by multiplex PCR targeting  
34 three DNA fragments of different length (128 bp, 332 bp and 612 bp). Our results show  
35 that both the type of dietary sample and the DNA fragment size explain a significant part  
36 of the variation found in prey DNA detectability. Specifically, despite a significant  
37 decrease in prey DNA detectability with increasing time post-feeding, we observed for  
38 both regurgitates and whole bodies significantly higher detection rates for all prey DNA  
39 fragment sizes compared to feces. Based on these observations, we conclude that  
40 regurgitates and whole body DNA extracts provide similar information when prey DNA is  
41 targeted by diagnostic PCR, whereas prey DNA detections success in feces is still good  
42 enough to use this approach in ecological studies. Therefore, regurgitates and feces  
43 constitute an excellent, non-lethal source for dietary information that could be applied to  
44 field studies in situations when invertebrate predators should not be harmed.

45

46

47

## 48 **Introduction**

49 DNA-based diet analysis is rapidly being employed as a widespread tool for  
50 empirically characterizing diet and trophic interactions in a broad range of vertebrates  
51 and invertebrates (Traugott *et al.* 2013; Clare 2015). DNA-based methods for diet  
52 analysis typically rely on the detection of short fragments of prey DNA, recovered from  
53 predator's gut contents (e.g. Leray *et al.* 2015; Mollot *et al.* 2014) or other types of  
54 dietary samples such as feces, regurgitates, or the entire consumer's body (e.g. Ibanez  
55 *et al.* 2013; Kartzinel *et al.* 2015; Thalinger *et al.* 2016; Wallinger *et al.* 2015). The  
56 success of DNA-based approaches to analyze trophic interactions is mainly due to the  
57 fact that they require little technical training while allowing the direct and accurate  
58 identification of trophic links from minute amount of any starting material, even of very  
59 small-sized organisms such as mites (Pérez-Sayas *et al.* 2015) or zooplankton (Durbin  
60 *et al.* 2012). Furthermore, the rapid growth of public sequence databases and  
61 methodological improvements in detection sensitivity and high-throughput technology  
62 offer time- and cost-effective procedures applicable to a great variety of ecological  
63 systems and to large sample sizes (e.g. Valentini *et al.* 2009; Pompanon *et al.* 2012;  
64 Sint *et al.* 2011). DNA-based diet analysis has a particularly long history in studies  
65 involving invertebrate generalist predators (Symondson 2012). Indeed, DNA methods  
66 offer a sensitive and flexible alternative to traditional behavioural or dissecting  
67 techniques that often fail to detect prey that does not leave hard remains in these cryptic  
68 liquid feeders (Traugott *et al.* 2013). But DNA techniques are also subject to bias and,  
69 prey DNA detection success could be hampered by a variety of factors among which  
70 the type of dietary sample could play an important role (King *et al.* 2008; Pompanon *et*

71 *al.* 2012; Traugott *et al.* 2013). In the case of arthropods, whole body extracts are  
72 usually the most convenient source of dietary DNA that avoids laborious dissections.  
73 But besides the drawbacks of a lethal approach, whole body extracts may pose  
74 additional challenges especially in the case of DNA metabarcoding diet analysis. As  
75 DNA metabarcoding combines general primers and high-throughput sequencing, the  
76 concomitant amplification of consumer DNA usually compromises the detection success  
77 of scarcer and degraded prey DNA (*e.g.* Shehzad *et al.* 2012; Piñol *et al.* 2014).  
78 Waldner & Traugott (2012) demonstrated that regurgitates, a fluid mixture containing  
79 semi-digested prey remains and digestive enzymes, obtained from predatory carabid  
80 beetles provided superior prey DNA detection rates compared to whole body DNA  
81 extracts. Another prospective source of food DNA are feces, although their use as a  
82 dietary source in invertebrates is still uncommon (*e.g.* Ibanez *et al.* 2013; Redd *et al.*  
83 2014; Sint *et al.* 2015). Usually, both regurgitates and feces seem to provide similar or  
84 better detection rates compared to whole body extracts (Durbin *et al.* 2012; Egeter *et al.*  
85 2015; Unruch *et al.* 2016), and contain comparatively much less consumer DNA,  
86 making them an ideal source for metabarcoding diet analysis. Nonetheless, to date we  
87 lack a comparative and quantitative assessment of the respective efficiency in detection  
88 success between whole bodies, regurgitates and feces as well as prospective  
89 interactions with other sources of non-dietary variation such as the target DNA fragment  
90 size.

91 In this study, we address this knowledge gap by comparing the prey DNA  
92 detection rates for three types of dietary samples: whole predator tissues, regurgitates  
93 and feces. Samples were generated in a controlled feeding experiment involving a

94 widespread carabid predator, *Pterostichus melanarius* (Coleoptera: Carabidae). Beetles  
95 were fed with a single known prey species and dietary samples were collected at  
96 several time points post-feeding. Collected samples were screened by diagnostic PCR  
97 for three prey DNA fragments of contrasting size: 128 bp, 332 bp, and 612 bp,  
98 respectively. We hypothesized (i) similar or better DNA detection probability in  
99 regurgitates compared to whole beetles due to lesser degradation of prey DNA; (ii)  
100 inferior detection probability in feces compared to regurgitates and whole bodies as they  
101 represent the final stage of the digestion process; and (iii) a decrease in DNA prey  
102 detection success with increasing DNA fragment size and the time post-feeding for all  
103 types of samples.

104

## 105 **Material & Methods**

106

### 107 **Sampling and maintenance of predators**

108 *P. melanarius* individuals were collected by dry pitfall traps in two adjacent maize  
109 fields situated at the experimental site of INRA Le Rheu (Ille-et-Vilaine, France; GPS  
110 coordinates: 48.10744282N; 1.78830482W). Regular 24-hour trapping sessions  
111 occurred in July – August 2013 until a sufficient number of individuals had been  
112 collected. All living beetles were brought to the laboratory where they were identified to  
113 the species level and individually placed in plastic containers filled with loam. Beetles  
114 were stored at room temperature and continuously provided with water and food (field-  
115 collected earthworms and small pieces of apple).

116

## 117 **Feeding experiment**

118           Prior to the feeding experiment, beetles were starved for 96 h in fresh individual  
119 plastic Petri dishes (5 cm diameter) containing only a droplet of water. After the  
120 starvation period, all beetles were transferred to a new Petri dish and provided with one  
121 freshly freeze-killed mealworm (*Tenebrio molitor*, Coleoptera: Tenebrionidae) cut in half.  
122 Carabids were allowed to feed for one hour in a dark climatic chamber at 20°. After  
123 feeding, all beetles were transferred into fresh Petri dishes with no food and stored at  
124 room temperature. Beetles were continuously provided with water during the  
125 experiment.

126           For the “whole beetle” treatment, batches of 10 randomly chosen carabids were  
127 frozen in 2-mL reaction tubes by immersion in liquid nitrogen at 0, 12, 24, 36, 48, 60, 72  
128 and 96 h post-feeding. Thirteen starved beetles were never allowed to feed and they  
129 were freeze-killed at 0 h to be used as negative controls. For the “regurgitate” treatment,  
130 batches of 10 randomly chosen individuals were allowed to regurgitate on a cotton wool  
131 tip according to the protocol described in Waldner & Traugott (2012) at 0, 12, 24, 36, 48,  
132 60, 72 and 96 h post-feeding. Exactly the same procedure at each time point was  
133 applied on a control tip without touching a beetle for checking potential DNA carry-over  
134 contaminations. All samples were stored at -20°C prior to DNA extraction and PCR. For  
135 the “feces” treatment, 20 carabid beetles were placed after feeding in new Petri dishes  
136 with a droplet of clean water. They were firstly checked for feces production at every 3  
137 hours, and then at every 6 hours as droppings have become scarcer. Detected feces  
138 were immediately frozen within the Petri dish at -20°C whereas the corresponding

139 carabid individual was transferred into a new Petri dish. Feces production was  
140 monitored until all beetles died.

#### 141 **Molecular gut content analysis**

142 Regurgitate and fecal samples were directly lysed in 200 µl TES Lysis Buffer  
143 (Macherey-Nagel, Germany) and 5 µl Proteinase K (10 mg/mL) overnight at 56°C. The  
144 whole beetles were previously grinded using three 4 mm stainless steel beads (Lemoine  
145 S.A.S, Rennes, France) within a volume of 620 µl TES Lysis Buffer and 10 µl  
146 Proteinase K (10 mg/mL) per beetle. Tissues were disrupted by a 1 minute bead-  
147 beating step using a professional paint mixer. All samples were incubated overnight at  
148 56°C. Respectively 2, 6, and 2 lysate blanks (i.e. no DNA material) were carried out for  
149 the whole beetles, fecal and regurgitate treatments. DNA was extracted in batches of 92  
150 samples using the Biosprint 96 DNA Blood Kit (Qiagen, Hilden, Germany) on a  
151 Biosprint® 96 extraction robotic platform (Qiagen) following the manufacturer's  
152 instruction. DNA was finally diluted in 200 µl TE buffer (0.1 M TRIS, pH 8, 10 mM  
153 EDTA) and the extracts were stored at -28 °C. To avoid contamination, DNA extractions  
154 were done in a separate pre-PCR laboratory using a UVC-equipped laminar flow hood.  
155 To check for sample-to-sample cross-contamination, four extraction negative controls  
156 (PCR-grade RNase-free water instead of lysate) were included within each batch of 92  
157 samples. All of these controls tested negative using the diagnostic PCR assay  
158 described below.

159 The DNA extracts were screened with a multiplex PCR assay targeting three DNA  
160 fragments of different lengths of *T. molitor*, i.e. 128 bp, 332 bp, and 612 bp. The primer  
161 mix contained 6 µM of primers Ten-mol-S210 (5'-TACCGTTATTCGTATGAGCAGTAT-

162 3') and Ten-mol-A212 (5'- CGCTGGGTCAAAGAAGGAT-3') as well as 2  $\mu$ M of primers  
163 Ten-mol-S232 (5'-TAATAAGAAGAATTGTAGAAAACGGG-3') and Ten-mol-S231 (5'-  
164 TCATTTTTGGAGCGTGATCC-3') (Oehm *et al.* 2011; Sint *et al.* 2011). Each 10  $\mu$ l PCR  
165 consisted of 1.5  $\mu$ l template DNA, 5.0  $\mu$ l of 2x Multiplex PCR Kit reaction mix (Qiagen),  
166 1.0  $\mu$ l of primer mix, 0.5  $\mu$ l of bovine serum albumin (BSA, 10 mg ml<sup>-1</sup>), and 2.0  $\mu$ l of  
167 PCR-grade RNase-free water (Qiagen) to adjust the volume. Cycling conditions were 15  
168 min at 95 °C, 35 cycles of 30 sec at 94 °C, 90 sec at 63 °C, 1 min at 72 °C, and final  
169 elongation 10 min at 72 °C. To check for amplification success and DNA carry-over  
170 contamination, two positive (mealworm DNA) and two negative controls (PCR water  
171 instead of DNA) were included within each PCR, respectively.

172 The PCR products obtained were visualized using QIAxcel, an automated capillary  
173 electrophoresis system (Qiagen), with method AL320. The results were scored with  
174 Biocalculator Fast Analysis Software version 3.0 (Qiagen) and the threshold was set to  
175 0.07 relative fluorescent units. Samples above this threshold and showing the expected  
176 fragment length were counted as positives. All DNA extracts that were tested negative  
177 in the first run were re-tested with general primers (Folmer *et al.* 1994) in a second PCR  
178 to check if any DNA is amplifiable. To ensure contamination-free conditions, PCR  
179 preparation and visualization of PCR products were done in two separate laboratories  
180 (workflow: from pre- to post-PCR areas).

181

## 182 **Statistical analyses**

183 All statistical analyses were run using the R software (R Core Team 2013). A  
184 generalized linear mixed model was built to fit a logistic regression on the DNA



185 detection data. We integrated three fixed effects into the model: two qualitative factors,  
186 the marker size (128 bp, 332 bp, 612 bp) and the sample type (regurgitates, faeces or  
187 whole body DNA extracts), and one continuous variable, the time post-feeding.  
188 Individuals were included as a random effect. The model was fitted using the *glmm*  
189 function from the *glmm* R package (<https://cran.r-project.org/web/packages/glmm>). We  
190 run 1024 independent fittings of the model, with 10,000 iterations for each run. The  
191 distribution of each of the model parameters was approximated to a normal distribution  
192 using the maximum goodness-of-fit estimation provided by the *fitdist* function of the  
193 *fitdistrplus* R package (Delignette-Muller & Dutang 2015). The variance in detectability  
194 rates explained by the model was estimated using the coefficient of determination  
195 method (Tjur 2009). Significance of the differences in detectability rates associated to  
196 the modalities of the qualitative factors (marker length and sample type) were assessed  
197 through the testing of differences in the mean of their associated parameter in the  
198 model using a Z-test. The time point for a prey detection probability of 50% (i.e. the time  
199 point at which on average half of the individuals show positive for the target prey) was  
200 determined for each dietary sample and DNA fragment size. Comparisons between  
201 fragments were based on 95% confidence limits (CI).

202

## 203 **Results**

204 Detectability of mealworm DNA in *P. melanarius* significantly decreased with  
205 increasing post-feeding time and prey DNA fragment length for the three dietary  
206 samples (Fig. 1, small vs medium and small vs large fragments:  $p < 0.001$ ; medium vs  
207 large fragment:  $p = 0.008$ ), with post-feeding detection intervals being longest for the

208 shortest DNA fragment (Fig. 1 A, B, C). We also observed a significant effect of the  
209 dietary sample type, with prey DNA detection success being significantly lower in feces  
210 compared to regurgitates and whole beetles for all the three fragment sizes (Fig. 1, in all  
211 cases  $p < 0.001$ ). There was also a tendency for longer post-feeding detection periods in  
212 regurgitates compared to whole beetles (Fig. 1A, B) but differences were not significant  
213 ( $p = 0.4$ ). Our model fitted well the data for all of the three dietary samples: regurgitates  
214 (Fig. 1A), whole beetles (Fig. 1B) and feces (Fig. 1C), and explained 52% of the  
215 variance in DNA detectability. Raw data are presented in Table 1. For the small prey  
216 DNA fragment, 50% retention times was the highest for regurgitates (94 hours) but the  
217 value significantly dropped by more than half for the medium fragment (42 hours) and  
218 was significantly shortest for the largest prey DNA fragment (30.6 hours; Table 2). In  
219 feces 50% detection probabilities were the lowest for all the three DNA fragment sizes,  
220 with only 19 hours for the largest DNA fragment (612 pb) and a significantly shorter  
221 detection probability for the medium prey DNA fragment when compared to the  
222 regurgitate samples (Table 2).

223

## 224 **Discussion**

225 Prey DNA detection success is determined by a range of interacting factors,  
226 which might be difficult to disentangle without conducting comprehensive experiments  
227 that explicitly account for factor multiplicity. Here, by comparing multiple dietary samples  
228 from one species of invertebrate consumer in a controlled feeding experiment we  
229 assess the joint effects of the type of dietary sample and DNA fragment size on the  
230 post-feeding prey DNA detection probability. Our results show that both of these factors

231 significantly affect the quickness in the temporal decrease in prey DNA detection  
232 probability. Consistent with our hypothesis, the DNA detection rate was the highest for  
233 regurgitates, for all the three tested DNA fragment sizes. Additionally, prey DNA in feces  
234 was the least detectable and detection rate decayed most rapidly with time for the three  
235 fragment sizes. Concurrently, no significant differences in DNA detection success were  
236 observed between regurgitates and whole beetles. Our results reinforce the general  
237 idea that regurgitates constitute a good alternative to DNA extracts from whole  
238 individuals as source of prey DNA (Waldner & Traugott 2012; Wallinger *et al.* 2015).  
239 Such alternative could be particularly useful in manipulative food web experiments,  
240 where the mortality of the target species could disturb the system under study. As 79%  
241 of predaceous land-dwelling arthropods use extra-oral digestion (Cohen 1995), this  
242 approach is potentially applicable to a large array of taxa and ecological situations.  
243 Finally, by containing comparatively less predator DNA, regurgitates could also be a  
244 valuable source of dietary data in metabarcoding studies involving the use of general  
245 primers (Waldner & Traugott, 2012). Considering feces, our results show that prey DNA  
246 detection success was lower compared to regurgitates and whole bodies. Note,  
247 however, that when considering the 50% prey DNA detection probability, only for the  
248 medium sized fragment a significantly lower post-feeding interval could be found in  
249 faeces compared to regurgitates. This indicates that faeces overall are a good source of  
250 dietary DNA in this carabid beetle. These observations are in line with previous results  
251 in wolf spiders showing that prey DNA was detectable in spider faeces albeit in lower  
252 rates compared to whole body DNA extracts (Sint *et al.* 2015). Hence, feces remain an  
253 interesting non-lethal dietary source in certain situations, as detection rates are

254 generally high. For instance, spiders are typically an important group of generalist  
255 feeders that usually do not regurgitate and the sole non-lethal dietary sample that could  
256 be collected are feces. Although, as prey DNA concentrations tend to be lower, it would  
257 be advisable to concentrate extracted DNA in order to improve DNA detectability. But  
258 low prey DNA concentrations in feces may not always be the rule depending on the  
259 taxon under study. In a recent paper, Unruch et al. (2016) showed no differences in  
260 DNA detection success between whole bodies and feces in the insect predator *Forficula*  
261 *auricularia*. While the authors do not discuss the possible mechanisms behind this  
262 observation, results tend to suggest that feces could be at least as good dietary source  
263 as whole body extracts for organisms such as *F. auricularia*. Finally, we cannot exclude  
264 that in our case DNA in feces could also have been less well preserved here due to the  
265 constraints of the experiment. As carabids were checked for feces every 6 hours by the  
266 end of the experiment, one may expect that feces deposited earlier within that  
267 timeframe would experience higher DNA degradation due to longer exposure to ambient  
268 temperatures and atmosphere. This might have negatively affected the prey DNA  
269 amplification success and increased the variability in the fecal diet data. In this line, it is  
270 essential to bring attention to the fact that we still lack a good understanding about the  
271 temporal window of a full prey DNA transfer across the digestive tract in insects. Results  
272 have shown that <sup>14</sup>C-inulin labelled prey in carabid beetles could still be detected in  
273 feces up to five days post-feeding (Cheeseman and Gillott 1987). For generalist feeders  
274 with frequent switching behavior such as carabids (Lövei & Sunderland, 1996), temporal  
275 aspects of the digestion process should be taken into account in manipulative food web  
276 experiments as we ignore at what extend a dietary sample reflects the most recent

277 feeding event. We also ignore whether this problem could be exacerbated in  
278 herbivorous species as plant DNA can survive much longer the digestion process in  
279 insects as compared to animal DNA (Staudacher *et al.* 2011; Wallinger *et al.* 2013,  
280 2015). A more general insight into the digestion physiology of carabid beetles with  
281 regard to prey DNA decay will certainly improve the interpretation of DNA-based dietary  
282 information.

283         Here, we also show that prey DNA detection success continuously decreases  
284 over time for all the three types of dietary samples, with longer fragments (332-612 bp)  
285 decaying more rapidly compared to the shorter one (128 bp). These results meet our  
286 expectations and corroborate the general idea that digested DNA molecules break  
287 down relatively quickly and that the size of the targeted prey DNA fragment affects post-  
288 feeding prey DNA detection success (Agustí *et al.* 2003; von Berg *et al.* 2008). In line  
289 with previous studies, our results reinforce the idea that targeting short to medium size  
290 DNA fragments in DNA diet analysis is essential in order to maximize the prey detection  
291 success (Deagle *et al.* 2006; Valentini *et al.* 2009). Nonetheless, if a recent feeding  
292 event is the focus, then targeting longer fragments might actually be better. Additionally,  
293 as in metabarcoding diet analysis there is generally a trade-off between DNA fragment  
294 length and taxonomic resolution, targeting longer DNA fragments – within a certain  
295 range - could indeed improve the taxonomic discrimination of prey species (Waldner *et*  
296 *al.* 2013). In this study, the most important observed source of variation in terms of prey  
297 DNA detection success is DNA fragment size. This could have profound implications in  
298 metabarcoding studies where the DNA fragment size needs usually to be optimized in  
299 order to meet criteria for both optimal detectability and taxonomic resolution (Taberlet *et*

300 *al.* 2012). It would be interesting to simultaneously explore the decaying rate of  
301 detection probability of a larger array of DNA fragment lengths in order to assess  
302 whether a general relationship between DNA length and detectability can be drawn  
303 despite the many other sources of variability detected in previous studies. One might  
304 speculate that a consistent relationship between DNA detection success and DNA  
305 fragment size could be further used as a raw predictor of the DNA detection rate based  
306 solely on DNA length.

307         In general, our findings evidence that quantitative analyses of diet based on  
308 different DNA fragments or on different dietary samples are not directly comparable.  
309 Our study suggests that consumption frequency should be corrected to account for  
310 differences in detection sensibility – related in our case to the type of dietary sample  
311 and the DNA fragment size. Such corrective approach would allow direct comparisons  
312 across molecular diet studies based on different kind of samples. Nevertheless, prey  
313 DNA detection success depends on numerous additional factors including species  
314 identity of the prey or the predator (Hosseini *et al.* 2008; Wallinger *et al.* 2013), the time  
315 since the last meal, the number/size or the quality of prey consumed (Hoogendoorn &  
316 Heimpel 2001; Harper *et al.* 2005; Eitzinger *et al.* 2014), which we did not investigated  
317 here. The very next step therefore would be the integration of multiple sources of  
318 variation in a complex multispecies, multifactorial experimental design where the  
319 different sources of variation could be quantified at once, and hierarchized (Welch *et al.*  
320 2014).

321

322

323

324

### 325 **Acknowledgements**

326 We thank Paul Abrams for his invaluable help with early analyses of data presented  
327 here. This study was founded by the French National Research Agency (Peerless  
328 project ANR-12-AGRO-0006). S.K. was funded by the Atlantic Canada Opportunities  
329 Agency. R.M. was supported by a grant of the regional government of Tyrol (“Land  
330 Tirol”) provided by the Mountain Agriculture Research Unit of the University of  
331 Innsbruck.

332

### 333 **Data Accessibility**

334 All the data used in this manuscript are included in the figure and the table presented  
335 within the paper.

336

### 337 **Author Contributions**

338 MT, SK and MP designed the experiment. SK realized the field work and the feeding  
339 experiment. RM carried out molecular analyses. EC realized data analyses. SK wrote  
340 the manuscript with input from all the authors.

341

342 **Conflicts of Interest:** The authors have declared that no competing interests exist.

343

344

## 345 Bibliography

346  
347 Agustí N, Shayler SP, Harwood JD, Vaughan IP, Sunderland KD, Symondson WOC  
348 (2003) Collembola as alternative prey sustaining spiders in arable ecosystems: prey  
349 detection within predators using molecular markers. *Molecular Ecology*, **12**,  
350 3467e3475.

351  
352 Cheeseman MT, Gillott C (1987) Organization of protein digestion in adult *Calosoma*  
353 *calidum* (Coleoptera: Carabidae). *Journal of Insect Physiology*, **33**, 1-8.

354  
355 Clare EL (2015) Molecular detection of trophic interactions: Emerging trends, distinct  
356 advantages, significant considerations and conservation applications. *Evolutionary*  
357 *Applications*, **7**, 1144-1157.

358  
359 Cohen AC (1995) Extra-oral digestion in predaceous terrestrial Arthropoda. *Annual*  
360 *review of entomology*, **40**, 85–103.

361  
362 Deagle BE, Eveson JP, Jarman SN (2006) Quantification of damage in DNA  
363 recovered from highly degraded samples—a case study on DNA in faeces. *Frontiers*  
364 *in Zoology*, **3**, 1.

365  
366 Delignette-Muller ML, Dutang C (2015) fitdistrplus: An R package for fitting  
367 distributions. *Journal of statistical software*, **4**, 1-34.

368  
369 Durbin EG, Casas MC, Ryneerson TA (2012) Copepod feeding and digestion rates  
370 using prey DNA and qPCR. *Journal of Plankton Research*, **34**, 72-82.

371  
372 Egeter B, Bishop PJ, Robertson BC (2015) Detecting frogs as prey in the diets of  
373 introduced mammals: a comparison between morphological and DNA-based diet  
374 analyses. *Molecular Ecology Resources*, **15**, 306–316.

375  
376 Eitzinger B, Unger EM, Traugott M, Scheu S (2014) Effects of prey quality and  
377 predator body size on prey DNA detection success in a centipede predator.  
378 *Molecular Ecology*, **23**, 3767-3776.

379  
380 Folmer O, Black M, Hoeh W et al. (1994) DNA primers for amplification of  
381 mitochondrial cytochrome c oxidase subunit I from diverse metazoan invertebrates.  
382 *Molecular Marine Biology and Biotechnology*, **3**, 294-299.

383  
384 Harper GL, King RA, Dodd CS, Harwood JD, Glen DM et al. (2005) Rapid screening  
385 of invertebrate predators for multiple prey DNA targets. *Molecular Ecology*, **14**, 819-  
386 827.

387  
388 Hoogendoorn M, Heimpel GE (2001) PCR-based gut content analysis of insect  
389 predators: using ribosomal ITS-1 fragments from prey to estimate predation  
390 frequency. *Molecular Ecology*, **10**, 2059-2067.



- 391  
392 Hosseini R, Schmidt O, Keller MA (2008) Factors affecting detectability of prey DNA  
393 in the gut contents of invertebrate predators: a polymerase chain reaction-based  
394 method. *Entomologia Experimentalis et Applicata*, **126**, 194–202.  
395  
396 Ibanez S, Manneville O, Miquel C *et al.* (2013) Plant functional traits reveal the  
397 relative contribution of habitat and food preferences to the diet of grasshoppers.  
398 *Oecologia*, **173**, 1459–1470.  
399  
400 Kartzinel TR, Chen PA, Coverdale TC *et al.* (2015) DNA metabarcoding illuminates  
401 dietary niche partitioning by African large herbivores. *Proceedings of the National*  
402 *Academy of Sciences*, **112**, 8019–8024 (2015).  
403  
404 King RA, Read DS, Traugott M, Symondson WOC (2008) Molecular analysis of  
405 predation: a review of best practice for DNA-based approaches. *Molecular Ecology*,  
406 **17**, 947–963.  
407  
408 Leray M, Meyer CP, Mills SC (2015) Metabarcoding dietary analysis of coral  
409 dwelling predatory fish demonstrates the minor contribution of coral mutualists to  
410 their highly partitioned, generalist diet. *PeerJ*, **3**, e1047.  
411  
412 Lövei GL, Sunderland KD (1996) Ecology and behavior of ground beetles  
413 (Coleoptera: Carabidae). *Annual review of entomology*, **41**, 231–256.  
414  
415 Mollot G, Duyck P-F, Lefeuvre P *et al.* (2014) Cover Cropping Alters the Diet of  
416 Arthropods in a Banana Plantation: A Metabarcoding Approach. *PLoS ONE*, **9**,  
417 e93740.  
418  
419 Oehm J, Juen A, Nagiller K *et al.* (2011) Molecular scatology: how to improve prey  
420 DNA detection success in avian faeces? Improving prey DNA detection in avian  
421 faeces. *Molecular Ecology Resources*, **11**, 620–628 (2011).  
422  
423 Pérez-Sayas, C, Pina T, Gómez-Martínez MA *et al.* (2015) Disentangling mite  
424 predator-prey relationships by multiplex PCR. *Molecular Ecology Resources*, **15**,  
425 1330–1345.  
426  
427 Piñol J, San Andrés V, Clare EL *et al.* (2014) A pragmatic approach to the analysis  
428 of diets of generalist predators: the use of next-generation sequencing with no  
429 blocking probes. *Molecular Ecology Resources*, **14**, 18–26.  
430  
431 Pompanon F, Deagle BE, Symondson WOC *et al.* (2012) Who is eating what: diet  
432 assessment using next generation sequencing. *Molecular Ecology*, **21**, 1931–1950.  
433  
434 Redd KS, Ling SD, Frusher SD, Jarman S, Johnson CR (2014) Using molecular  
435 prey detection to quantify rock lobster predation on barrens-forming sea urchins.  
436 *Molecular Ecology*, **23**, 3849–3869.

- 437  
438 Shehzad W, Riaz T, Nawaz MA *et al.* (2012) Carnivore diet analysis based on next-  
439 generation sequencing: application to the leopard cat (*Prionailurus bengalensis*) in  
440 Pakistan. *Molecular Ecology*, **21**, 1951–1965.
- 441  
442 Sint D, Raso L, Kaufmann R *et al.* (2011) Optimizing methods for PCR-based  
443 analysis of predation. *Molecular Ecology Resources*, **11**, 795–801.
- 444  
445 Sint D, Thurner I, Kaufmann R, Traugott M (2015) Sparing spiders: Faeces as a  
446 non-invasive source of DNA. *Frontiers in Zoology*, **12**, doi:10.1186/s12983-015-  
447 0096-y
- 448  
449 Staudacher K, Wallinger C, Schallhart N, Traugott M (2011) Detecting ingested plant  
450 DNA in soil-living insect larvae. *Soil Biology & Biochemistry*, **43**, 346-350.
- 451  
452 Symondson, W.O.C., 2012. The molecular revolution: using polymerase chain  
453 reaction based methods to explore the role of predators in terrestrial food webs. In:  
454 Gurr, G.M., Wratten, S.D., Snyder, W.E., Read, D.M.Y. (Eds.), *Biodiversity and*  
455 *Insect Pests: Key Issues for Sustainable Management*. Wiley and Sons, pp. 166–  
456 184.
- 457  
458 Thalinger B, Oehm J, Mayr H *et al.* (2016) Molecular prey identification in Central  
459 European piscivores. *Molecular Ecology Resources*, **16**, 123–137.
- 460  
461 Tjur T (2009) Coefficients of Determination in Logistic Regression Models—A New  
462 Proposal: The Coefficient of Discrimination. *The American statistician*, **63**, 366–372.
- 463  
464 Traugott M, Kamenova S, Ruess L *et al.* (2013) Empirically characterising trophic  
465 networks: what emerging DNA-based methods, stable isotope and fatty acid  
466 analyses can offer. *Advances in Ecological Research*, **49**, 177.
- 467  
468 Unruh TR, Miliczky ER, Horton DR *et al.* (2016) Gut content analysis of arthropod  
469 predators of codling moth in Washington apple orchards. *Biological Control*,  
470 doi:10.1016/j.biocontrol.2016.05.014
- 471  
472 Valentini A, Miquel C, Muhammad AN *et al.* (2009) New perspectives in diet analysis  
473 based on DNA barcoding and parallel pyrosequencing: the trnL approach. *Molecular*  
474 *Ecology Resources*, **9**, 51-60.
- 475  
476 Von Berg K, Traugott M, Symondson WOC (2008) The effects of temperature on  
477 detection of prey DNA in two species of carabid beetle. *Bulletin of Entomological*  
478 *Research* **98**, 263-269.
- 479  
480 Waldner T, Sint D, Juen A *et al.* (2013) The effect of predator identity on post-  
481 feeding prey DNA detection success in soil-dwelling macro-invertebrates. *Soil*  
482 *Biology and Biochemistry*, **63**, 116–123.

- 483  
484 Waldner T, Traugott M (2012) DNA-based analysis of regurgitates: a noninvasive  
485 approach to examine the diet of invertebrate consumers. *Molecular Ecology*  
486 *Resources*, **12**, 669–675.
- 487  
488 Wallinger C, Sint D, Baier F et al. (2015) Detection of seed DNA in regurgitates of  
489 granivorous carabid beetles. *Bulletin of Entomological Research*, **1**, 1-8.
- 490  
491 Wallinger C, Staudacher K, Schallhart N, Peter E, Dresch P, Juen A, Traugott M  
492 (2013). The effect of plant identity and the level of plant decay on molecular gut  
493 content analysis in a herbivorous soil insect. *Molecular Ecology Resources*, **13**, 75–  
494 83.
- 495  
496 Welch KD, Schofield MR, Chapman EG, Harwood JD (2014) Comparing rates of  
497 springtail predation by web-building spiders using Bayesian inference. *Molecular*  
498 *Ecology*, **23**, 3814-3825.
- 499  
500

501 **Figure 1** Prey DNA detection success in the predatory carabid beetle *Pterostichus*  
502 *melanarius* for regurgitates (A), whole bodies (B) and feces (C). Detection rates are  
503 provided for the different time points examined within each dietary sample and for the  
504 three target DNA fragment sizes. Circles and dashed lines indicate actual measures.  
505 Bold solid lines indicate the logistic regressions estimated from the glmm model and the  
506 shaded area the 95% confidence interval envelopes of the fit. The horizontal line  
507 represents the 50% prey DNA detection probability. Corresponding lower and upper  
508 95% confidence limits are presented in Table 2.  
509

510 **Table 1** Detection rates of small (128 bp), medium (332 bp) and large (612 bp) prey  
511 DNA fragments of the mealworm *Tenebrio molitor* fed to the carabid *Pterostichus*  
512 *melanarius* in whole beetles, regurgitates, and feces. *N* is the number of samples  
513 analyzed per digestion time.  
514

515 **Table 2** Estimated time points post-feeding for a 50% prey DNA detection probability for  
516 the different types of dietary samples and DNA fragment sizes. Provided are the 50%  
517 prey detection probabilities in hours post-feeding. The numbers in parentheses refer to  
518 the corresponding lower and upper 95% confidence limits.  
519

520

521

522

523

524

525

### (A) Regurgitates

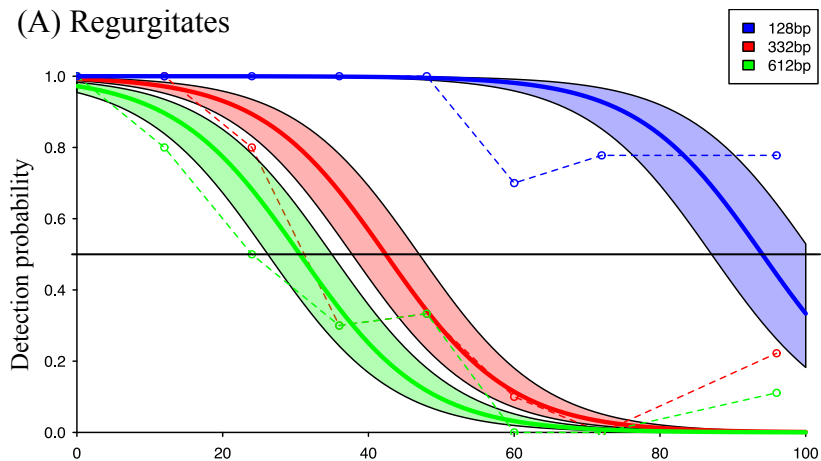

### (B) Whole bodies

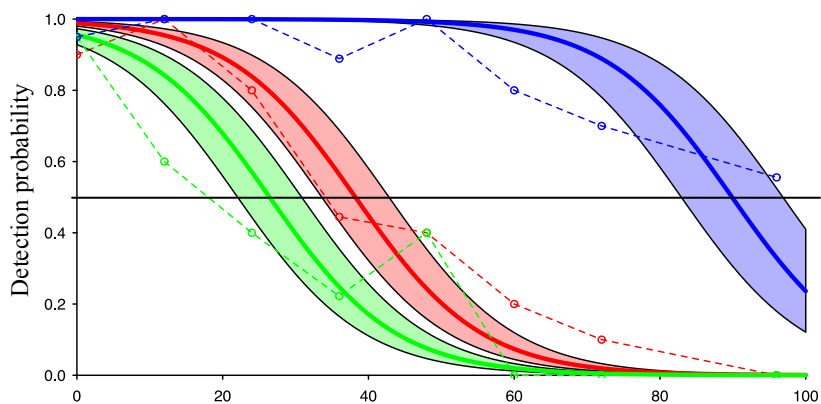

### (C) Feces

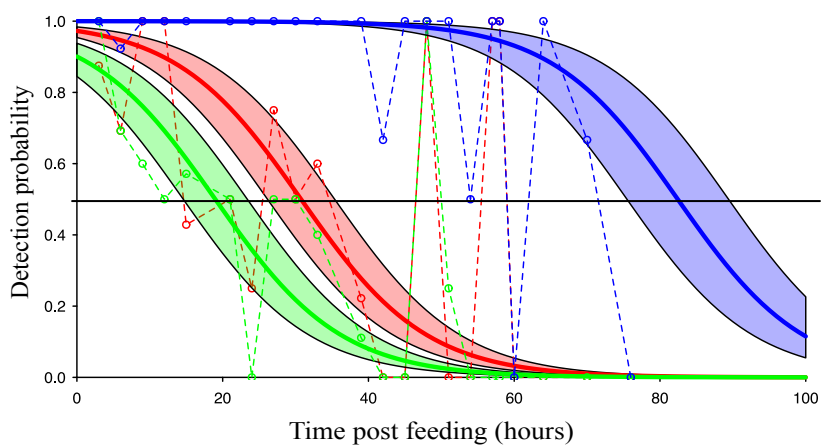

---



---

 Detection rate per fragment size (%)
 

---

| Dietary sample | Digestion time (h) | <i>n</i> | Small (128 bp) | Medium (332 bp) | Large (612 bp) |
|----------------|--------------------|----------|----------------|-----------------|----------------|
| Whole bodies   | 0                  | 20       | 95             | 90              | 95             |
|                | 12                 | 10       | 100            | 100             | 60             |
|                | 24                 | 10       | 100            | 80              | 40             |
|                | 36                 | 9        | 78             | 44              | 22             |
|                | 48                 | 10       | 100            | 40              | 40             |
|                | 60                 | 10       | 80             | 20              | 0              |
|                | 72                 | 10       | 70             | 10              | 0              |
|                | 96                 | 9        | 56             | 0               | 0              |
| Regurgitates   | 0                  | 11       | 100            | 100             | 100            |
|                | 12                 | 10       | 100            | 100             | 80             |
|                | 24                 | 10       | 100            | 80              | 50             |
|                | 36                 | 10       | 100            | 30              | 30             |
|                | 48                 | 9        | 100            | 33              | 33             |
|                | 60                 | 10       | 70             | 10              | 0              |
|                | 72                 | 9        | 78             | 0               | 0              |
|                | 96                 | 9        | 78             | 22              | 11             |
| Feces          | 3                  | 8        | 100            | 87,5            | 100            |
|                | 6                  | 13       | 92             | 69              | 69             |
|                | 9                  | 5        | 100            | 100             | 60             |
|                | 12                 | 4        | 100            | 100             | 50             |
|                | 15                 | 7        | 100            | 43              | 57             |
|                | 21                 | 2        | 100            | 50              | 50             |
|                | 24                 | 4        | 100            | 25              | 0              |
|                | 27                 | 12       | 100            | 75              | 50             |
|                | 30                 | 2        | 100            | 50              | 50             |
|                | 33                 | 5        | 100            | 60              | 40             |
|                | 39                 | 9        | 100            | 22              | 11             |
|                | 42                 | 3        | 67             | 0               | 0              |
|                | 45                 | 2        | 100            | 0               | 0              |
|                | 48                 | 3        | 100            | 100             | 100            |
|                | 51                 | 4        | 100            | 0               | 25             |
|                | 54                 | 2        | 50             | 0               | 0              |
|                | 57                 | 1        | 100            | 100             | 0              |
| 58             | 1                  | 100      | 100            | 0               |                |
| 60             | 1                  | 0        | 0              | 0               |                |
| 64             | 1                  | 100      | 0              | 0               |                |
| 70             | 3                  | 67       | 0              | 0               |                |
| 76             | 1                  | 0        | 0              | 0               |                |

| Dietary sample | <u>Small fragment</u><br>h | <u>Medium fragment</u><br>h | <u>Large fragment</u><br>h |
|----------------|----------------------------|-----------------------------|----------------------------|
| Regurgitates   | 94 (87/101)                | 42.4 (37.7/47)              | 30.6 (26.1/35)             |
| Whole body     | 89.9 (82.9/96.8)           | 38.2 (33.6/42.8)            | 26.4 (22/30.8)             |
| Feces          | 82.4 (75.5/89.4)           | 30.7 (26.1/35.4)            | 19 (14.6/23.4)             |
